# Supplementary material for: Construction of a polymer-based fluorescent probe with dual responsive sites for monitoring changes of lysosomal viscosity
Source: Royal Society of Chemistry journal article supplement (doi:10.1039/d3tb02232c), 2023-01-01
Supplement: d3tb02232c1.pdf [file d3tb02232c1.pdf]

Electronic Supplementary Information for

**Construction of a polymer-based fluorescent probe with dual responsive sites for monitoring the changes of lysosomal viscosity**

Faqi Yu <sup>a</sup>, Ruiyang Fan <sup>a</sup>, Yansheng Zhao <sup>a</sup>, Yijun Chen <sup>a</sup>, Xiuqi Kong <sup>a</sup>, Weiying Lin\* <sup>a, b</sup>

<sup>a</sup> Institute of Fluorescent Probes for Biological Imaging, School of Chemistry and Chemical Engineering, School of Materials Science and Engineering, University of Jinan, Jinan, Shandong 250022, P. R. China.

<sup>b</sup> Institute of Optical Materials and Chemical Biology, Guangxi Key Laboratory of Electrochemical Energy Materials, School of Chemistry and Chemical Engineering, Guangxi University, Nanning, Guangxi 530004, P. R. China.

E-mail: [weiyinglin2013@163.com](mailto:weiyinglin2013@163.com)

## Table of Contents

|                                                                |      |
|----------------------------------------------------------------|------|
| Materials and instruments.....                                 | S-3  |
| Synthesis of polymer-based fluorescent probe In-PHEM.....      | S-3  |
| Spectrum measurement of probe In-PHEM.....                     | S-3  |
| Cells culture and cytotoxicity assays.....                     | S-4  |
| Cell imaging and co-localization experiments.....              | S-4  |
| Fluorescent monitoring the viscosity changes in zebrafish..... | S-5  |
| Fig. S1.....                                                   | S-6  |
| Fig. S2.....                                                   | S-6  |
| Fig. S3.....                                                   | S-7  |
| Fig. S4.....                                                   | S-7  |
| Fig. S5.....                                                   | S-8  |
| Table S1.....                                                  | S-8  |
| Fig. S6.....                                                   | S-8  |
| Fig. S7.....                                                   | S-9  |
| Table S2.....                                                  | S-9  |
| Fig. S8.....                                                   | S-10 |
| Fig. S9.....                                                   | S-10 |
| Fig. S10.....                                                  | S-11 |
| Fig. S11.....                                                  | S-11 |
| Fig. S12.....                                                  | S-12 |
| Fig. S13.....                                                  | S-12 |

## Materials and instruments

All chemical reagents were of analytical grade and used without further purification unless otherwise stated. Solvents were purified by freshly distilled before using. Ultrapure water was used throughout all the experiments. TLC analysis obtained on silica gel plates and column chromatography, which was conducted on silica gel (mesh 200-300) and purchased from the Qingdao Ocean Chemicals.  $^1\text{H}$  and  $^{13}\text{C}$ NMR spectra were recorded on an AVANCE III 400 MHz digital NMR spectrometer, with TMS as internal standard. High resolution mass spectrometric (HRMS) analyses were measured on an Agilent 1100 HPLC/MSD spectrometer. UV-Vis absorption spectra were recorded on a Shimadzu UV-2700 spectrophotometer; fluorescence spectra were obtained on a HITACHI F4600 fluorescence spectrophotometer using a 1 cm standard quartz cell.

## Synthesis of polymer-based fluorescent probe In-PHEM

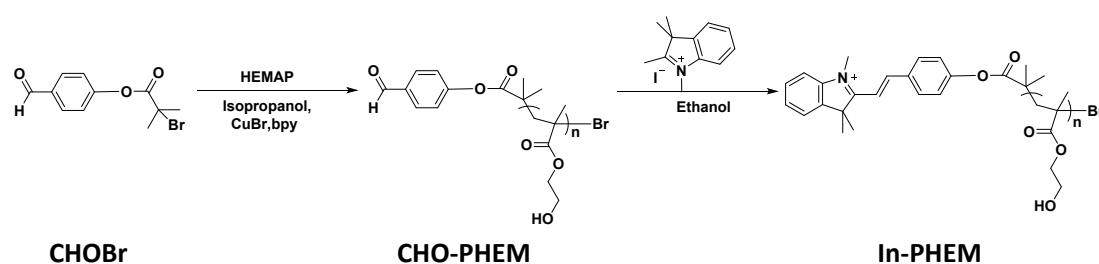

**Scheme S1.** Synthesis routes and chemical structures of polymer-based fluorescent probe **In-PHEM**.

## Spectrum measurement of probe In-PHEM

The stock solution (6 mg/mL) of probe **In-PHEM** was prepared by dissolving them in

methanol. 60  $\mu\text{g}/\text{mL}$  of **In-PHEM** was used throughout all the photophysical experiments by adding 20  $\mu\text{L}$  stock solution to 2.0 mL methanol and glycerol mixed solvents or PBS (pH 7.4). The solutions of the various interferents (100 mM) were prepared in the ultrapure water. The excitation wavelength is 350 nm and 440 nm, both of the excitation and emission slit widths are 5 nm.

### **Cells culture and cytotoxicity assays**

Living HeLa cells were used in this work and they were cultured in Dulbecco's modified Eagle's medium (DMEM) supplemented with 10% fetal bovine serum (FBS) in an atmosphere of 5%  $\text{CO}_2$  and 37  $^\circ\text{C}$ . After incubation with culture medium for 24 h, the cells will adhere to the glass surface during this period.

Colorimetric methyl thiazolyl tetrazolium (MTT) assays was applied to measure *in vitro* cytotoxicity of the probe **In-PHEM** to living HeLa cells.  $2 \times 10^4$  cells/mL cells were seeded in 96-well plates and then incubated with various concentrations of **In-PHEM** (0, 6, 12, 30, 60 and 120  $\mu\text{g}/\text{mL}$ ) for 24 h. Subsequently, 10  $\mu\text{L}$  MTT (5 mg/mL) was added to each well and incubated for another 3 h. At last, the media was removed and 100  $\mu\text{L}$  of DMSO was added to dissolve the formazan crystals. The plate was shaken for about 10 min and the absorbance of the solution was measured at 570 nm with a microplate reader. The cell viability was determined by assuming 100% cell viability for cells without **In-PHEM**.

### **Cell imaging and co-localization experiments**

For cell imaging, the cells were incubated with 60  $\mu\text{g}/\text{mL}$  **In-PHEM** for 30 min and then the medium was removed. To remove residual probe, the cells were washed three times using PBS before imaging. Finally, confocal fluorescence cell imaging was carried out using Nikon fluorescence microscope equipped with 405 and 488 nm excitation. The fluorescent signals were collected at 425-475 nm (blue channel) and 500-550 nm (green channel), respectively.

The co-localization experiments were carried out using Nile Red as the lipid droplets staining dye. HeLa cells were stained with 2  $\mu\text{M}$  Nile Red and 60  $\mu\text{g}/\text{mL}$  **In-PHEM** simultaneously. Blue channel was collected at 425-475 nm with excitation of 405 nm and green channel was collected at 500-550 nm with excitation of 488 nm. Red channel was collected at 570-620 nm with excitation of 488 nm.

### **Fluorescent monitoring the viscosity changes in zebrafish**

All procedures were according to the Guidelines for Care and Use of Laboratory Animals of Shandong University and approved by the Animal Ethics Committee of Shandong University. Before imaging, zebrafish was incubated with LPS, monensin or nystatin (10  $\mu\text{M}$ ) for 30 min and **In-PHEM** (60  $\mu\text{g}/\text{mL}$ ) for another 30 min. To remove residual probe, zebrafish was rinsed with water three times before imaging. Confocal microscopic imaging was performed under excitation at 405 and 488 nm and the emission wavelength was collected at 425-475 nm (blue channel) and 500-550 nm (green channel), respectively.

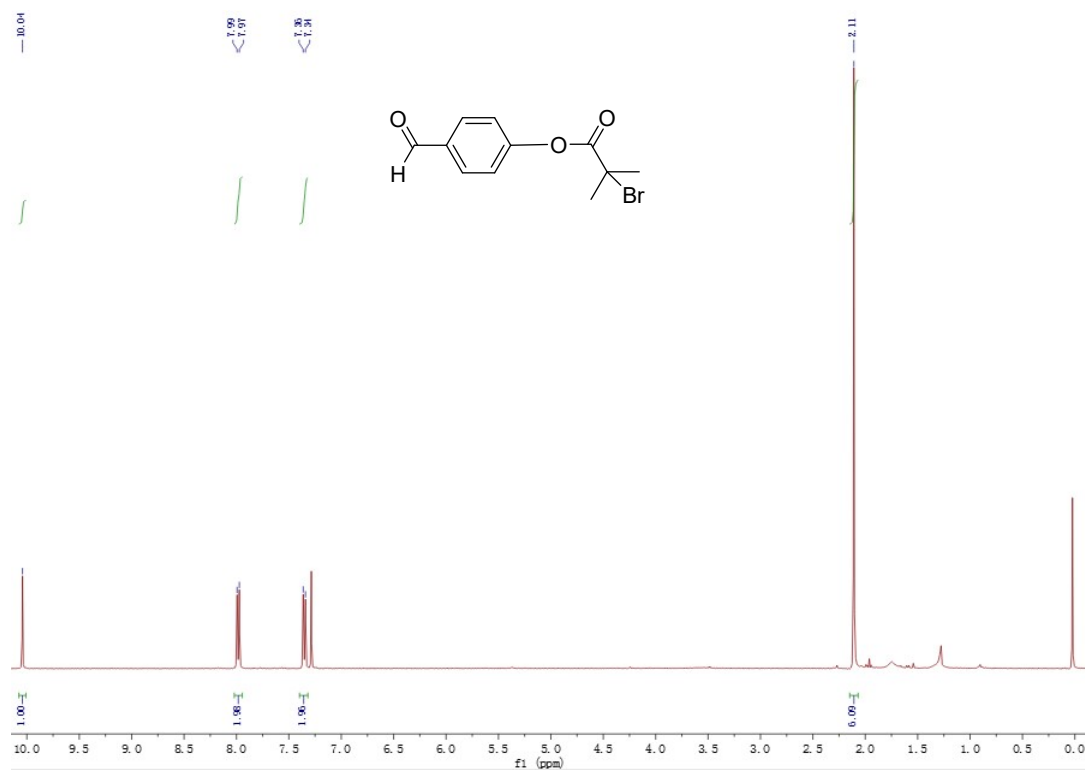

**Fig. S1.** The  $^1\text{H}$  NMR spectrum of initiator CHOBr in  $\text{CDCl}_3$ .

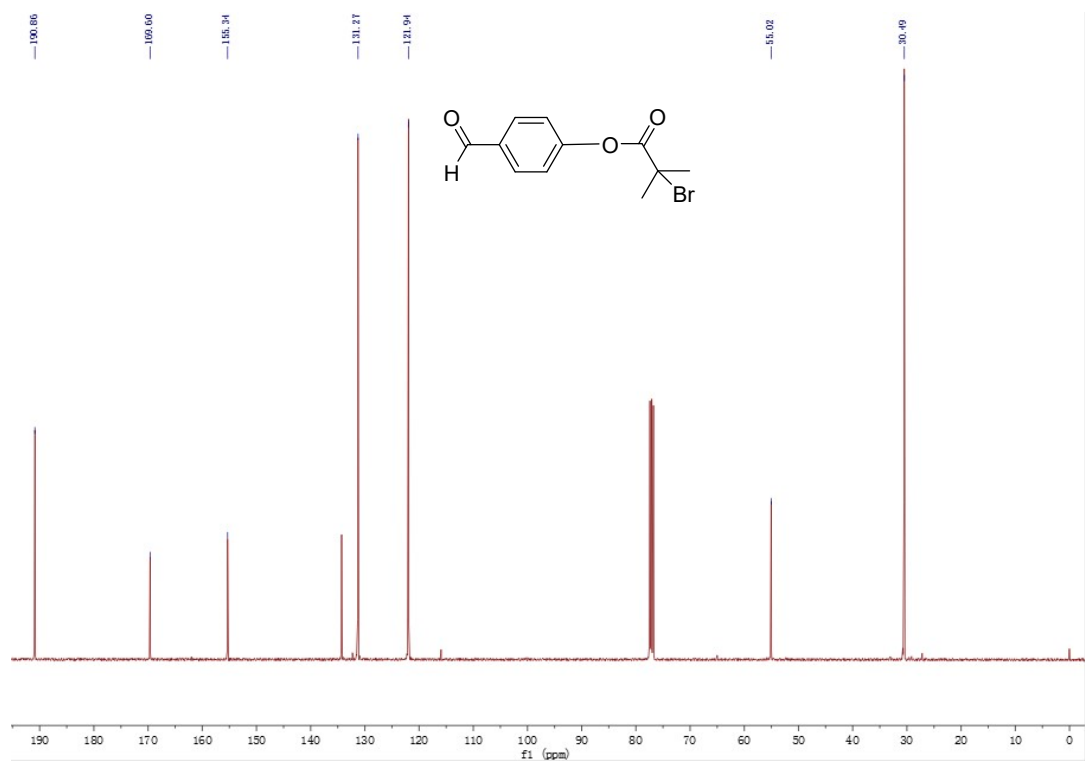

**Fig. S2.** The  $^{13}\text{C}$  NMR spectrum of initiator CHOBr in  $\text{CDCl}_3$ .

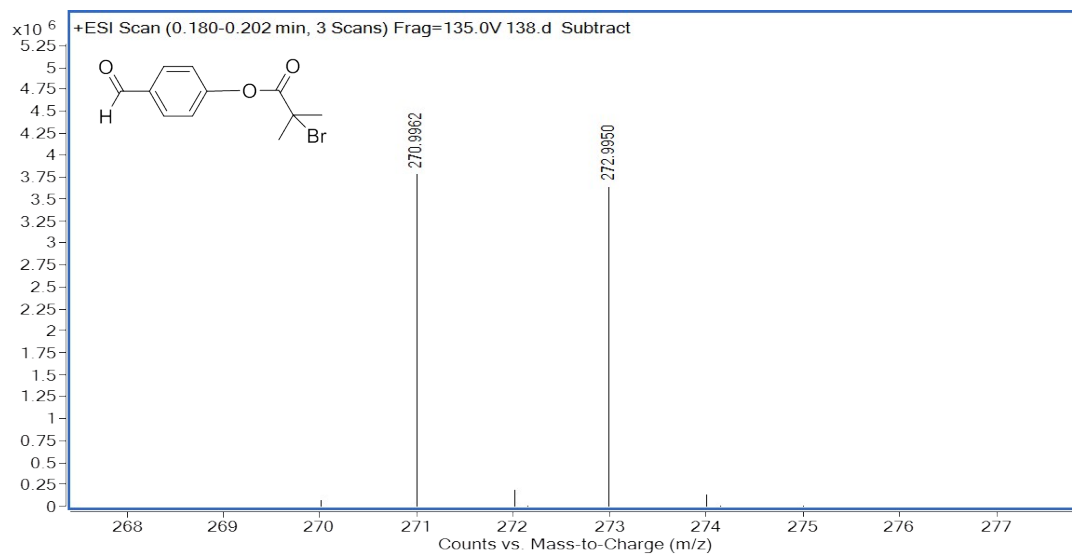

**Fig. S3.** The HRMS spectrum of initiator CHOBr.

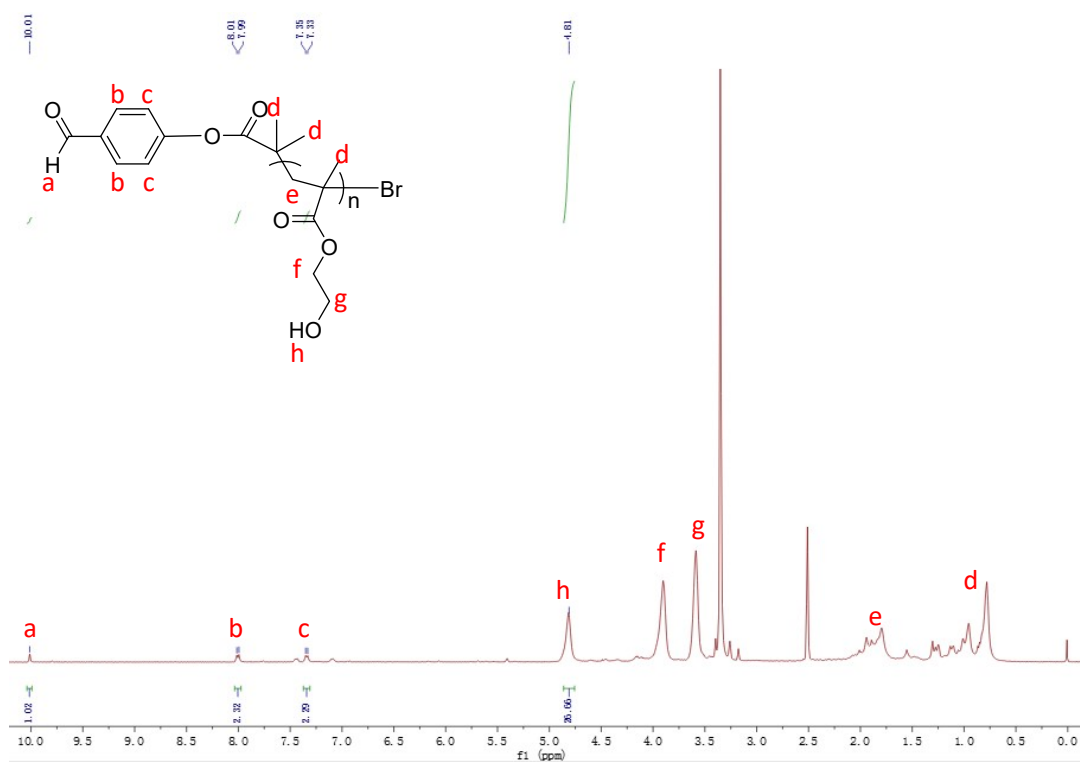

**Fig. S4.** The <sup>1</sup>H NMR spectrum of CHO-PHEM in DMSO-*d*<sub>6</sub>.

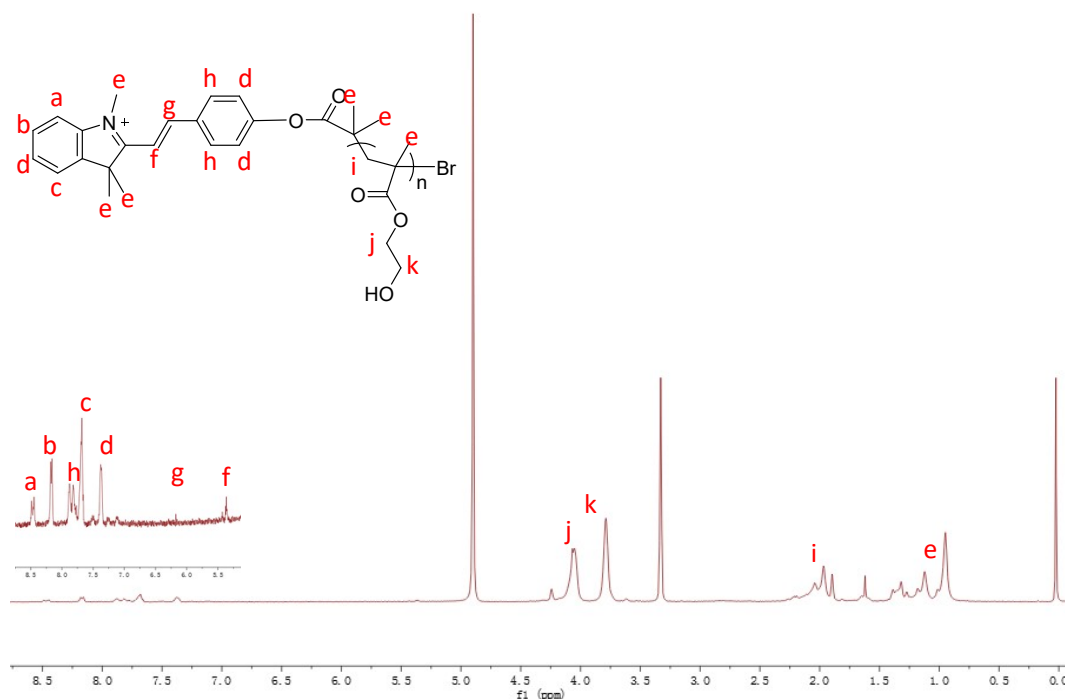

**Fig. S5.** The  $^1\text{H}$  NMR spectrum of **In-PHEM** in  $\text{CD}_3\text{OD}$ .

**Table S1.** GPC data of polymer In-PHEM.

| Polymer Name | $M_n$ | $M_w$ | $M_z$ | $M_z/M_w$ | PDI  |
|--------------|-------|-------|-------|-----------|------|
| In-PHEM      | 4906  | 5977  | 7443  | 1.26      | 1.22 |

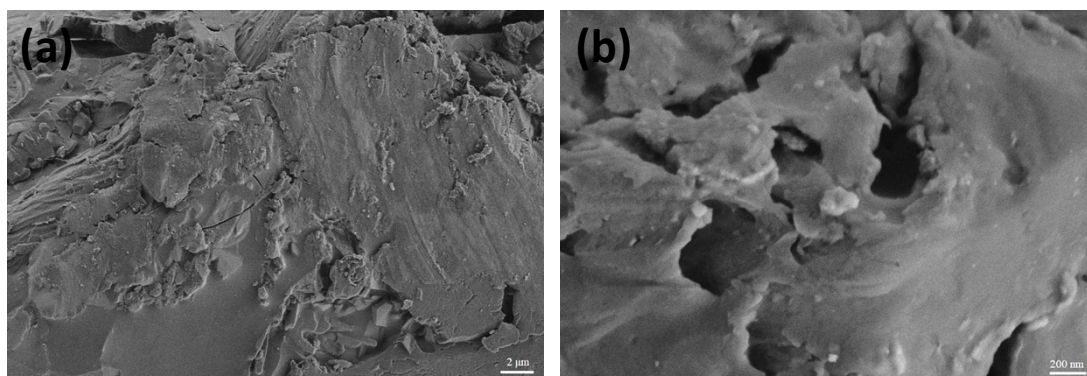

**Fig. S6.** (a, b) SEM images of polymer In-PHEM.



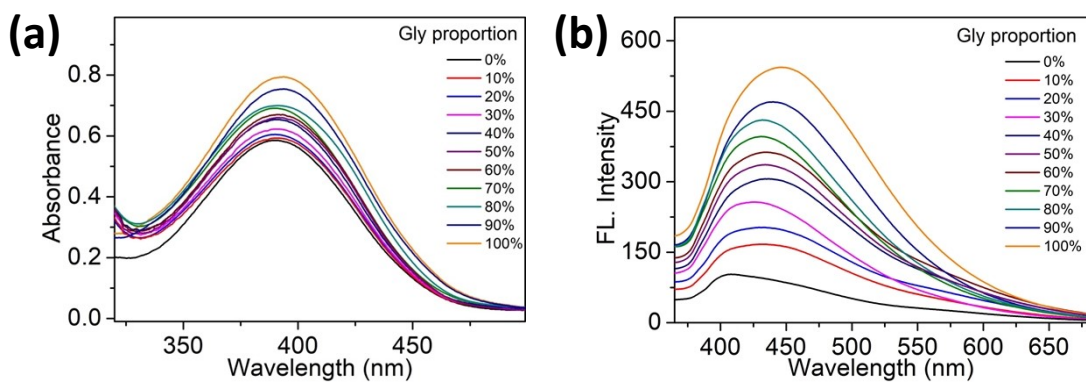

**Fig. S7.** (a) UV-Vis absorption spectra of **In-PHEM** (60  $\mu\text{g/mL}$ ) in methanol and glycerol with different volume fraction. (b) Fluorescence spectra of polymer CHO-PHEM (60  $\mu\text{g/mL}$ ) in methanol and glycerol mixture with different volume fraction ( $\lambda_{\text{ex}} = 350 \text{ nm}$ ).

**Table S2.** The viscosity and intensity properties of **In-PHEM** in methanol and glycerol mixture with different volume fraction.

| glycerol / methanol<br>(v: v) | $\eta/\text{cp}$ | $I_{440}$ | $I_{540}$ |
|-------------------------------|------------------|-----------|-----------|
| 0:10                          | 0.9              | 40.6      | 9.0       |
| 1:9                           | 1.3              | 43.1      | 11.7      |
| 2:8                           | 2.8              | 49.7      | 14.1      |
| 3:7                           | 8.7              | 62.2      | 19.5      |
| 4:6                           | 12.9             | 76.8      | 23.0      |
| 5:5                           | 25.7             | 83.9      | 26.9      |
| 6:4                           | 46.3             | 101.2     | 49.8      |
| 7:3                           | 82               | 139.8     | 68.0      |
| 8:2                           | 198.3            | 213.7     | 79.1      |
| 9:1                           | 501.3            | 242.5     | 98.8      |
| 10:0                          | 740              | 269.4     | 132.8     |

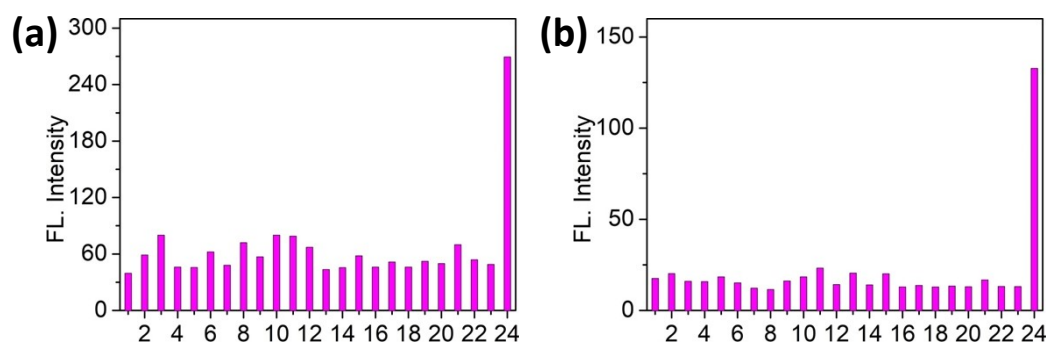

**Fig. S8.** (a) The fluorescence intensity of **In-PHEM** (60 µg/mL) to various relevant analytes in PBS (pH 7.4) under excitation at 350 nm. (b) The fluorescence intensity of **In-PHEM** (60 µg/mL) to various relevant analytes in PBS (pH 7.4) under excitation at 440 nm. 1, Only PBS; 2, CaCl<sub>2</sub>; 3, CoCl<sub>2</sub>; 4, CuCl<sub>2</sub>; 5, FeCl<sub>3</sub>; 6, HgCl<sub>2</sub>; 7, KCl; 8, MgCl<sub>2</sub>; 9, NiCl<sub>2</sub>; 10, SnCl<sub>2</sub>; 11, glucose; 12, Gly; 13, GSH; 14, Cys; 15, Na<sub>2</sub>S<sub>2</sub>O<sub>3</sub>; 16, Na<sub>2</sub>SO<sub>3</sub>; 17, NaClO; 18 NaHSO<sub>3</sub>; 19, NaNO<sub>2</sub>; 20, NaOAc; 21, OH<sup>-</sup>; 22, ONOO<sup>-</sup>; 23, H<sub>2</sub>O<sub>2</sub>; 24, glycerol.

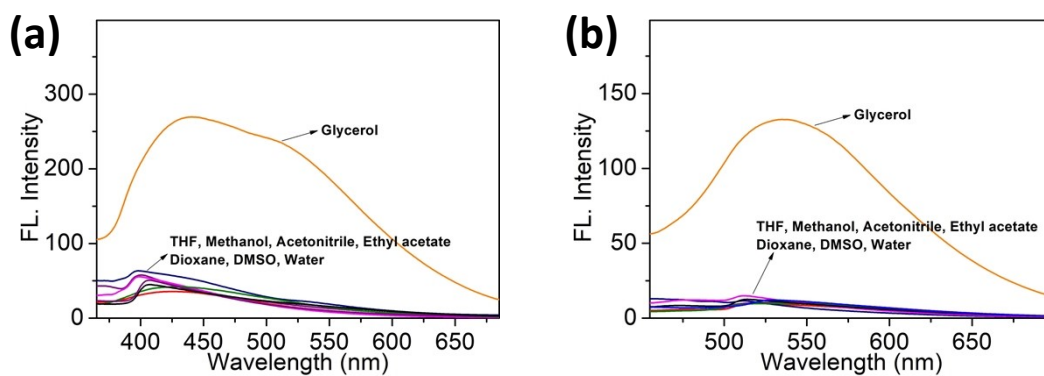

**Fig. S9.** (a) The fluorescence spectra of **In-PHEM** in solvents with different polarity values under excitation at 350 nm. (b) The fluorescence spectra of **In-PHEM** in solvents with different polarity values under excitation at 440 nm.

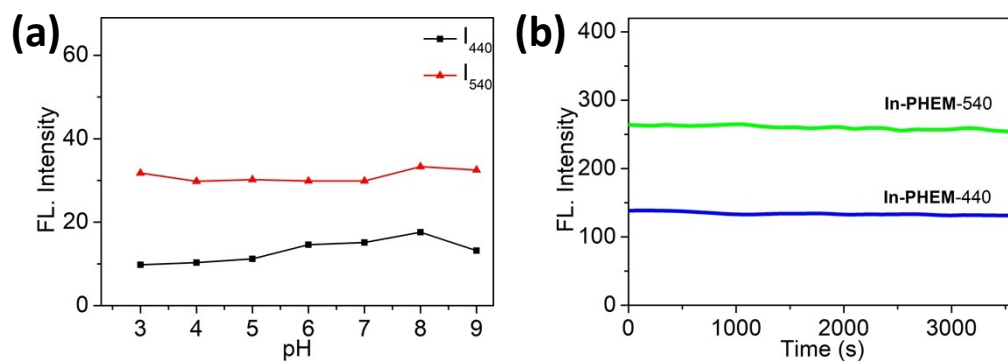

**Fig. S10.** (a) Fluorescent intensities ( $I_{542}$  and  $I_{457}$ ) of probe **In-PHEM** with excitation at 350 and 440 nm in different pH values. (b) The photostability tests of 60  $\mu\text{g/mL}$  of **In-PHEM** with ceaseless irradiation by laser light for 60 min.

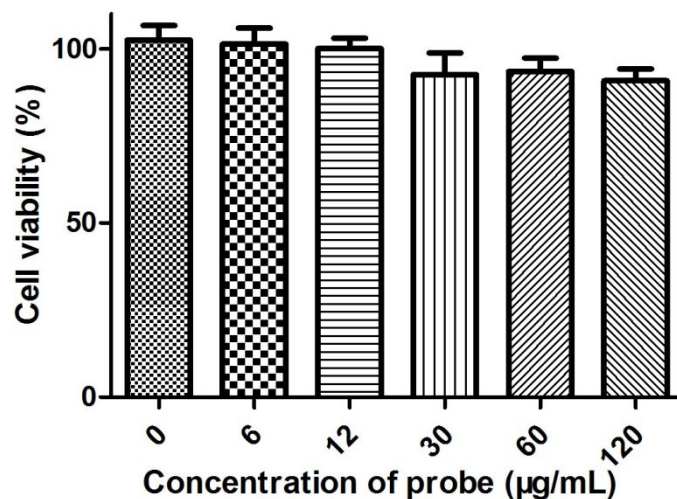

**Fig. S11.** The cell viability of living HeLa cells treated with 0, 6, 12, 30, 60 and 120  $\mu\text{g/mL}$  **In-PHEM** for 24 h and measured by standard MTT assay.

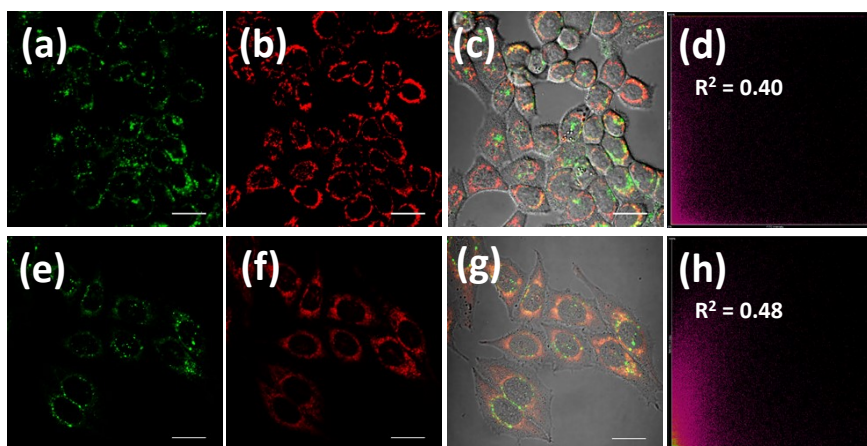

**Fig. S12.** Colocalization fluorescence images of the probe **In-PHEM** (60 µg/mL) with (a-d) 1 µM Mito-Tracker Red and (e-h) 1 µM ER-tracker Red. Scale bar: 20 µm.

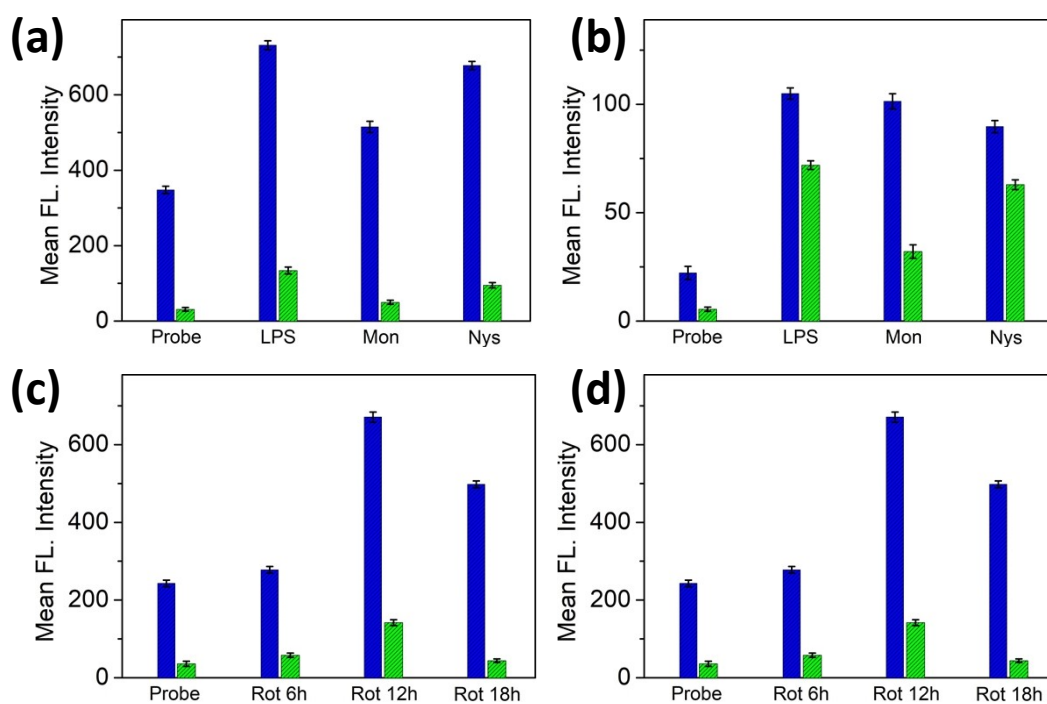

**Fig. S13.** The mean fluorescent intensities of blue and green channel shown in (a) Fig. 3, (b) Fig. 4, (c) Fig. 5 and (d) Fig. 6.
